# Supplementary material for: FSTL1 as a Potential Mediator of Exercise-Induced Cardioprotection in Post-Myocardial Infarction Rats
Source: PubMed Central journal article supplement (PMC5000295; doi:10.1038/srep32424), 2016-08-26
Supplement: srep32424-s1.pdf [file srep32424-s1.pdf]

Supplementary Materials for

**FSTL1 as a Potential Mediator of Exercise-Induced Cardioprotection in  
Post-Myocardial Infarction Rats**

Yue Xi, Da-Wei Gong, Zhenjun Tian\*

\*Corresponding author. E-mail: tianzj2013@hotmail.com

The Supplementary Materials includes:

Figure S1. Enhanced Akt, Erk1/2, AMPK and Smad1/5/8 signaling in myocardium of rats underwent MI and exercise.

Figure S2. Enhanced Akt, Erk1/2 and AMPK but not Smad1/5/8 signaling in myocardium of rats treated with FSTL1 vs. PBS control.

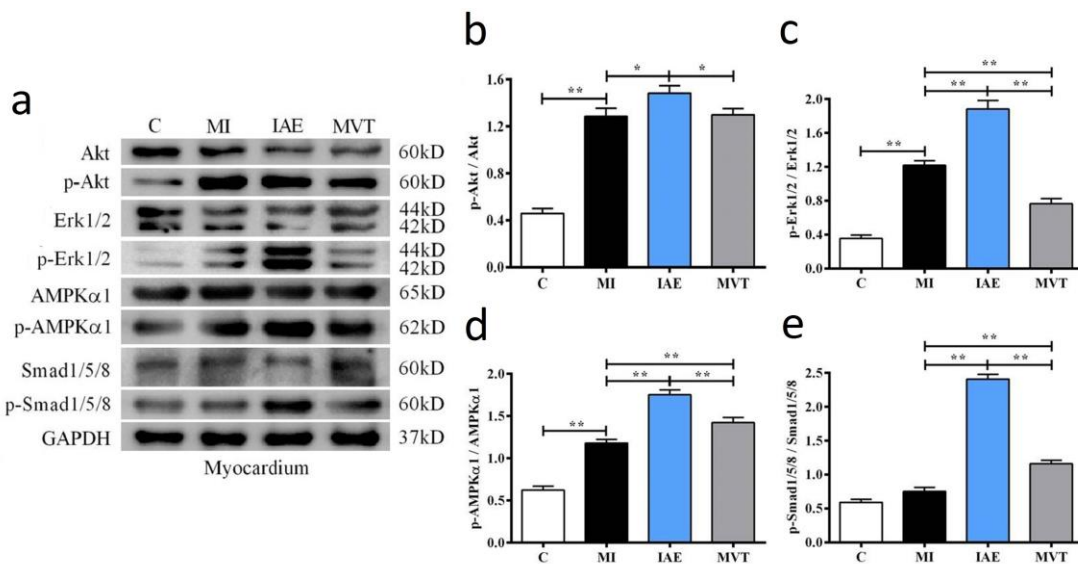

**Figure S1. Enhanced Akt, Erk1/2, AMPK and Smad1/5/8 signaling in myocardium of rats underwent MI and exercise**

Rats were subjected to sham operation (C) or myocardial infarction (MI). The MI rats were trained without or with intermittent aerobic exercise (IAE) or mechanical vibration training (MVT) for 4 weeks. a: Western blot results of Akt, phosphorylated Akt (p-Akt), Erk1/2, p-Erk1/2, AMPK $\alpha$ 1, p-AMPK $\alpha$ 1, Smad1/5/8 and p-Smad1/5/8. b-e: The quantification of Western blot analysis. Data are mean + SE (n = 6); \*: p < 0.05; \*\*: p < 0.01.

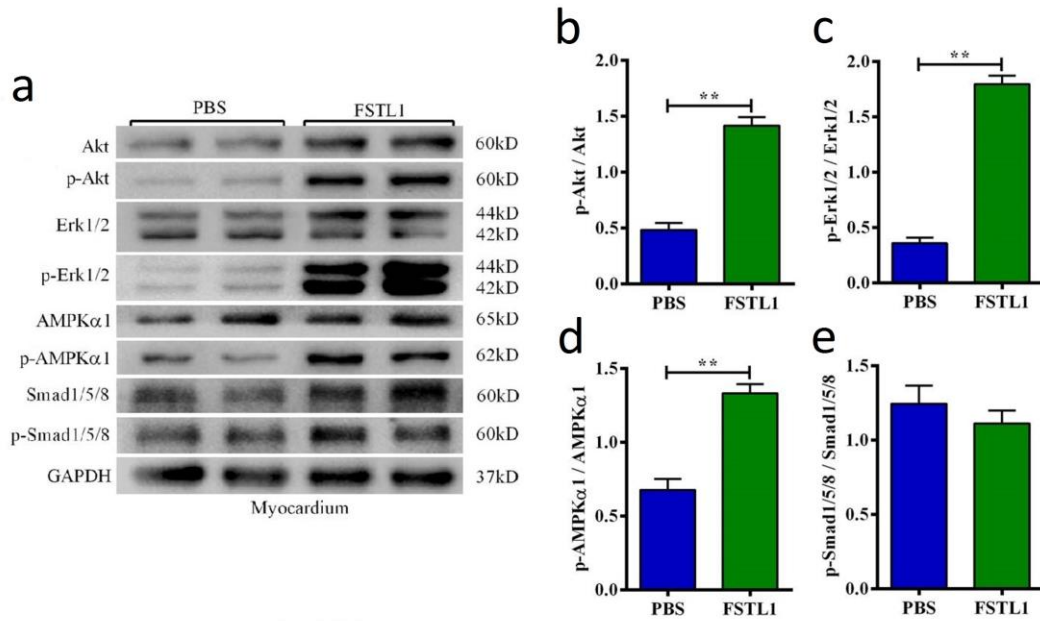

**Figure S2. Enhanced Akt, Erk1/2 and AMPK but not Smad1/5/8 signaling in myocardium of rats treated with FSTL1 versus PBS control**

Recombinant FSTL1 was administered one week post-MI and continued daily for 4 weeks (FSTL1), PBS injection as control (PBS). a: Western blot results of Akt, p-Akt, Erk1/2, p-Erk1/2, AMPK $\alpha$ 1, p-AMPK $\alpha$ 1, Smad1/5/8 and p-Smad1/5/8. b-e: The quantification of Western blot analysis. Data are expressed as mean + SE (n = 6); \*: p < 0.05; \*\*: p < 0.01.
